# Supplementary material for: Photobiological characteristics of chlorophyll a derivatives as microbial PDT agents
Source: Royal Society of Chemistry journal article supplement (doi:10.1039/c3pp50376c), 2014-04-11
Supplement: c3pp50376c1.pdf [file c3pp50376c1.pdf]

## Supporting Information

### Photobiological characteristics of chlorophyll a derivatives as microbial PDT agents

Marciana P. Uliana <sup>a,b</sup>, Layla Pires <sup>a</sup>, Sebastião Pratavieira <sup>a</sup>, Timothy J. Brocksom <sup>b</sup>, Kleber T. de Oliveira <sup>b</sup>, Vanderlei S. Bagnato <sup>a</sup>, Cristina Kurachi <sup>a\*</sup>

*a* Instituto de Física de São Carlos – Universidade de São Paulo, Av: Trabalhador São Carlense, 400, São Carlos, São Paulo 13566-590, Brazil.

*b* Departamento de Química, Universidade Federal de São Carlos, Rodovia Washington Luís, km 235 - SP-310, 13565-905, São Carlos – São Paulo, Brazil.

\*Corresponding author e-mail: [cristina@ifsc.usp.br](mailto:cristina@ifsc.usp.br) (Cristina Kurachi)

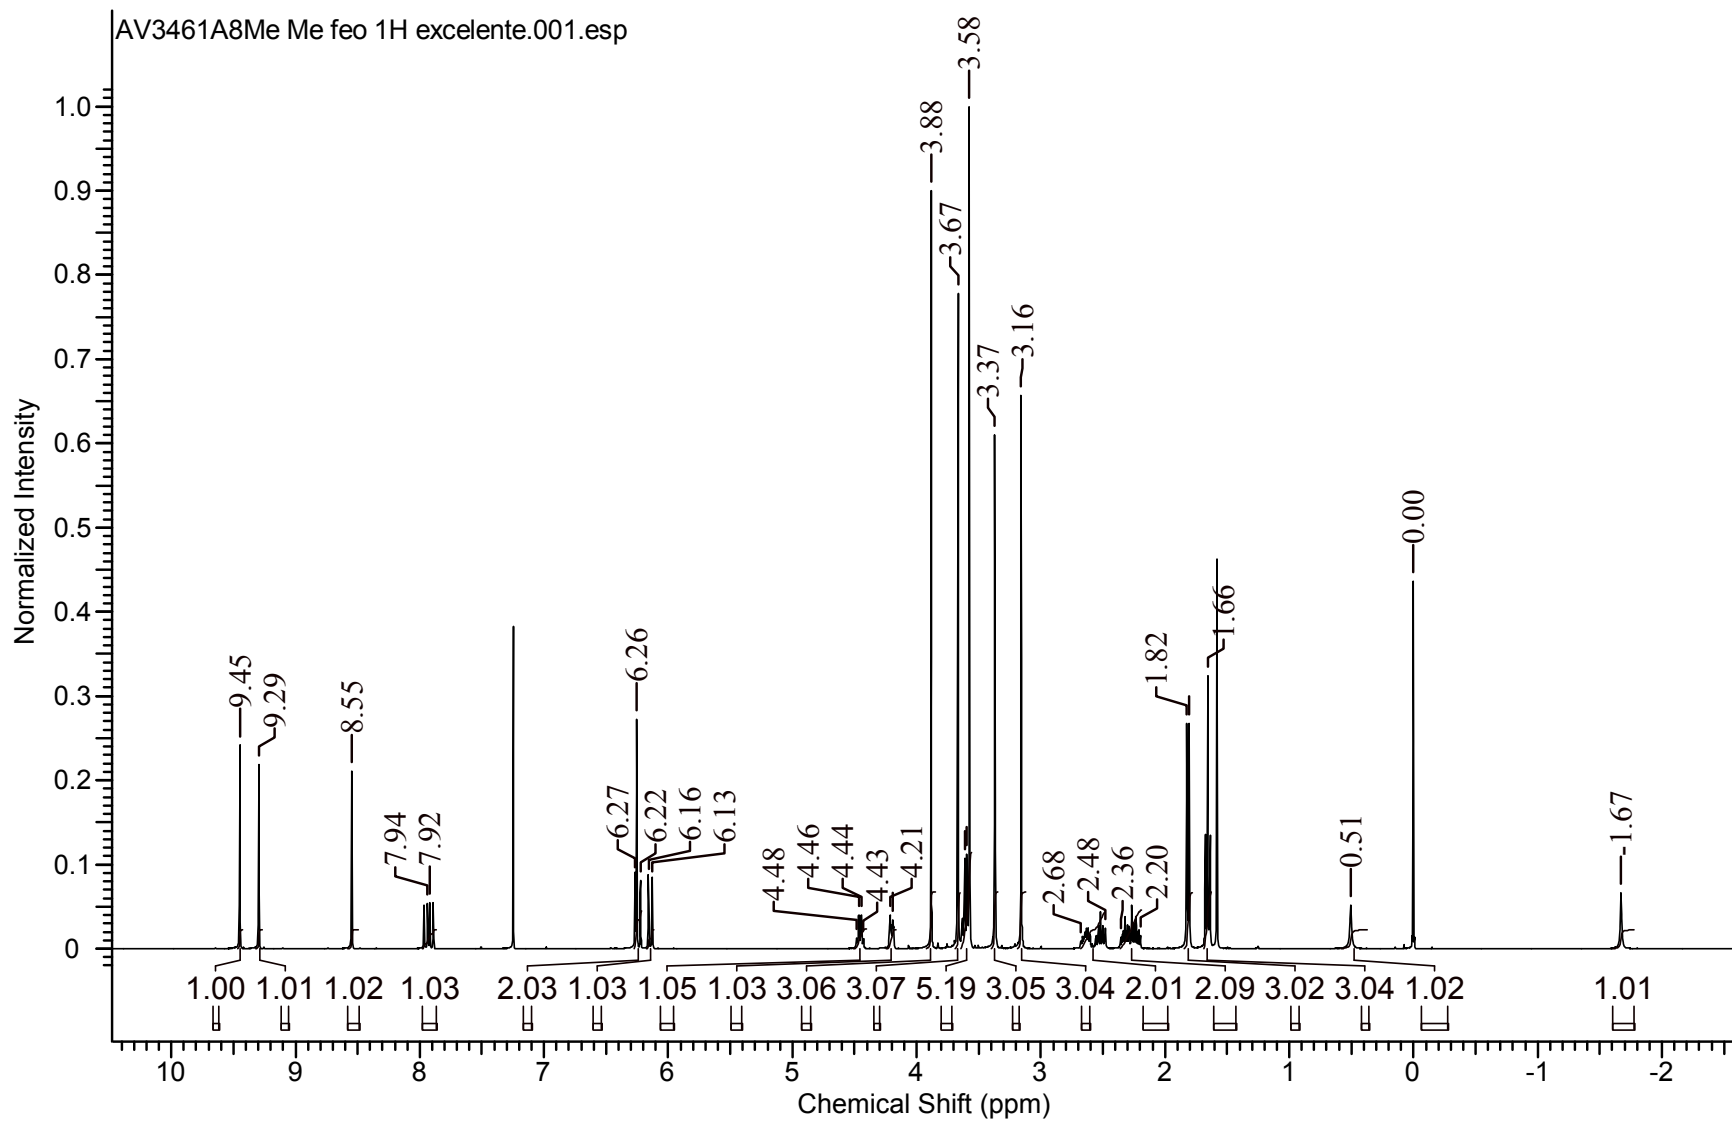

**Figure S1.**  $^1\text{H-NMR}$  (400 MHz) in  $\text{CDCl}_3$  of methyl pheophorbide-*a*.

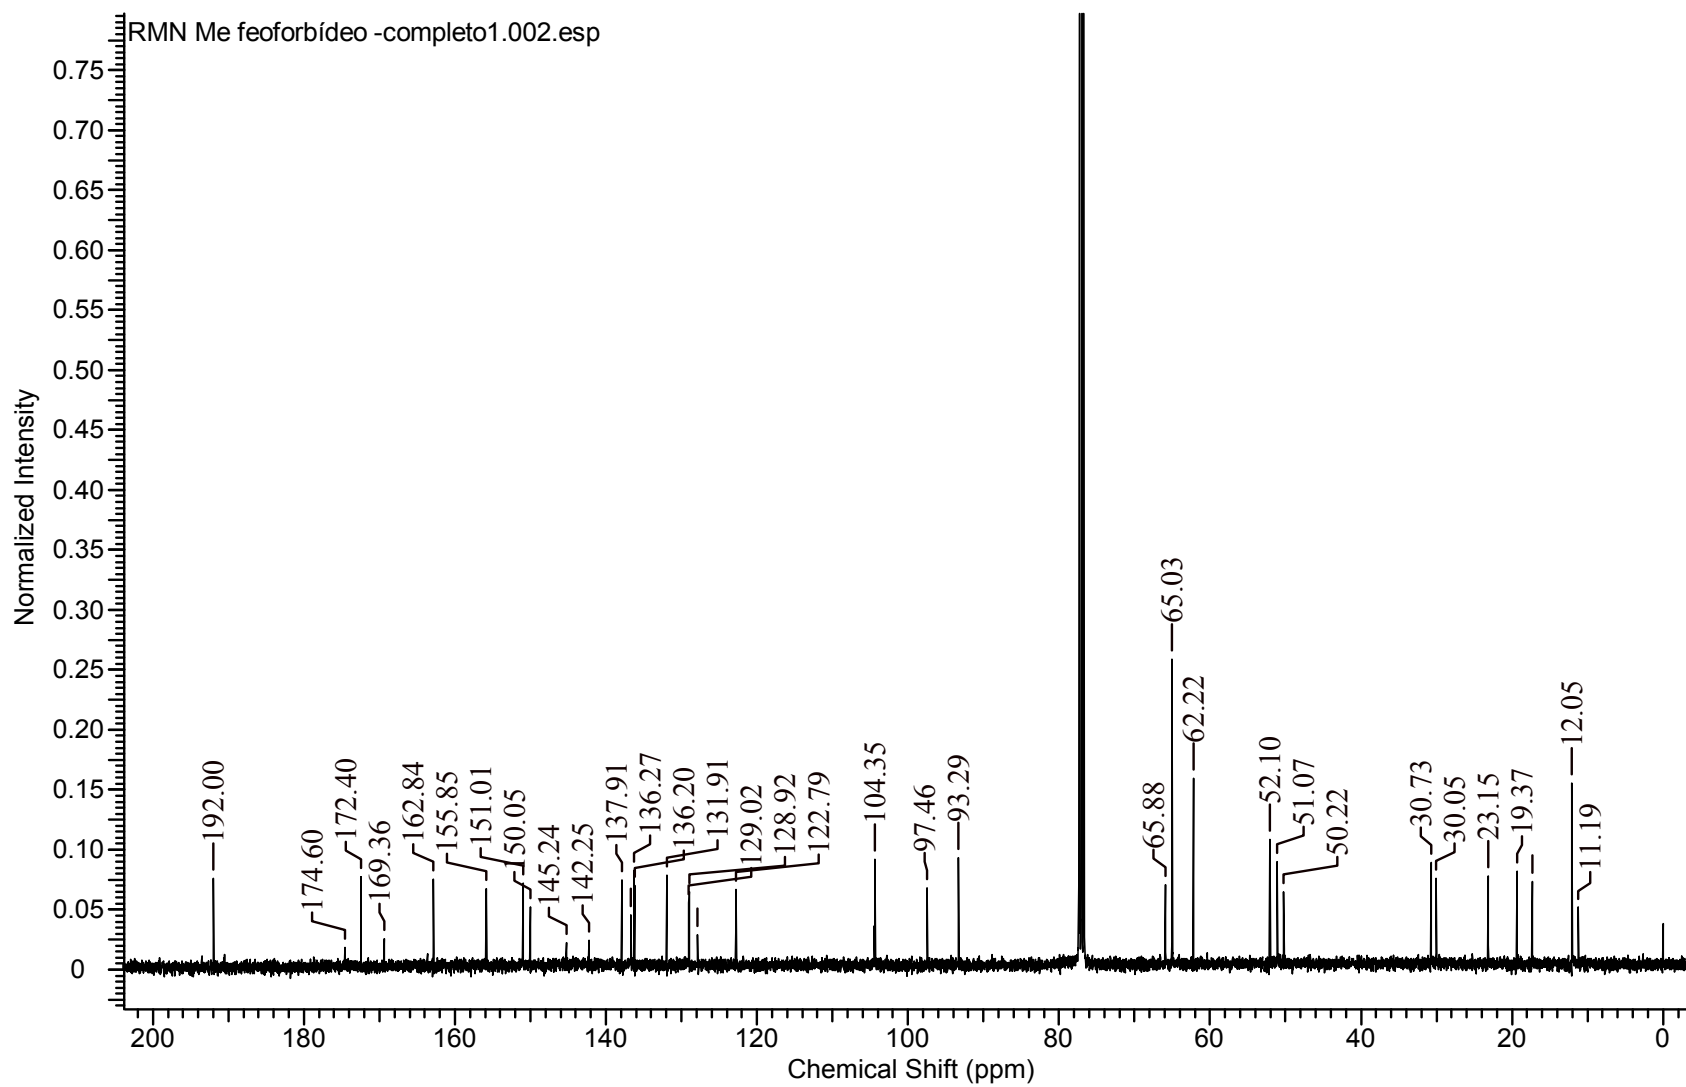

Figure S2.  $^{13}\text{C}$ -NMR (100 MHz) in  $\text{CDCl}_3$  of methyl pheophorbide-*a*.

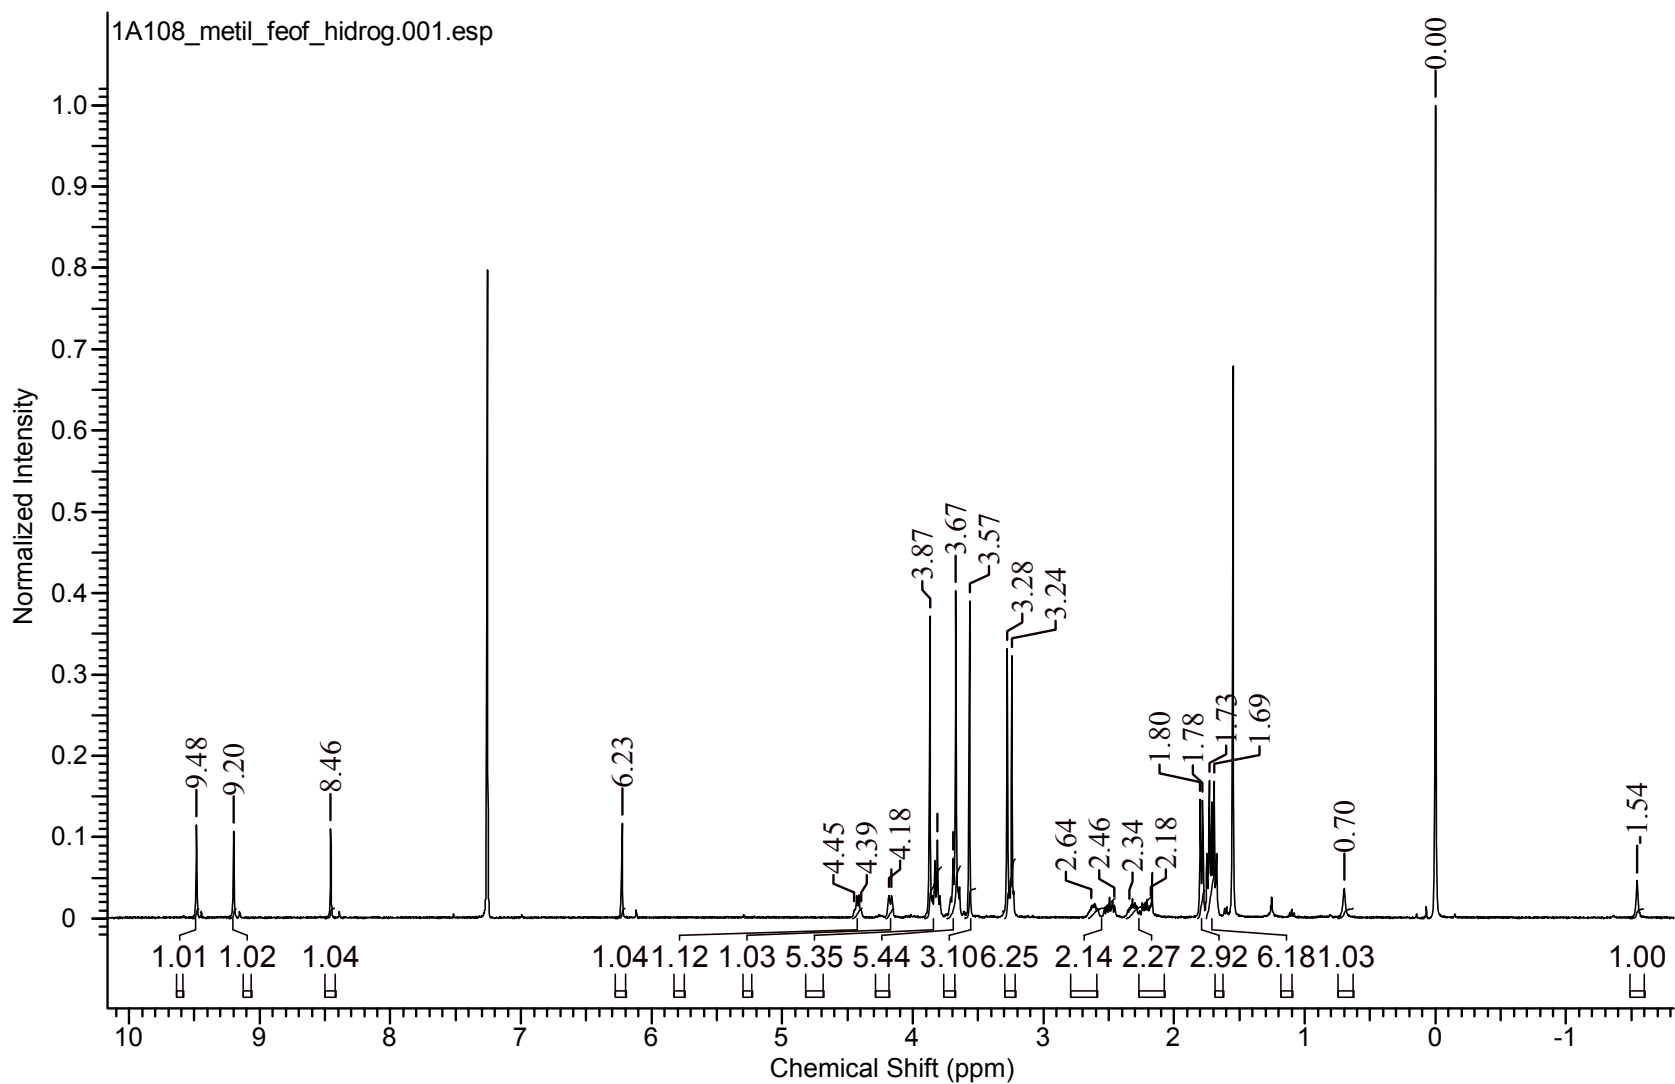

Figure S3.  $^1\text{H-NMR}$  (400 MHz) in  $\text{CDCl}_3$  of hydrogenated methyl pheophorbide-*a*.

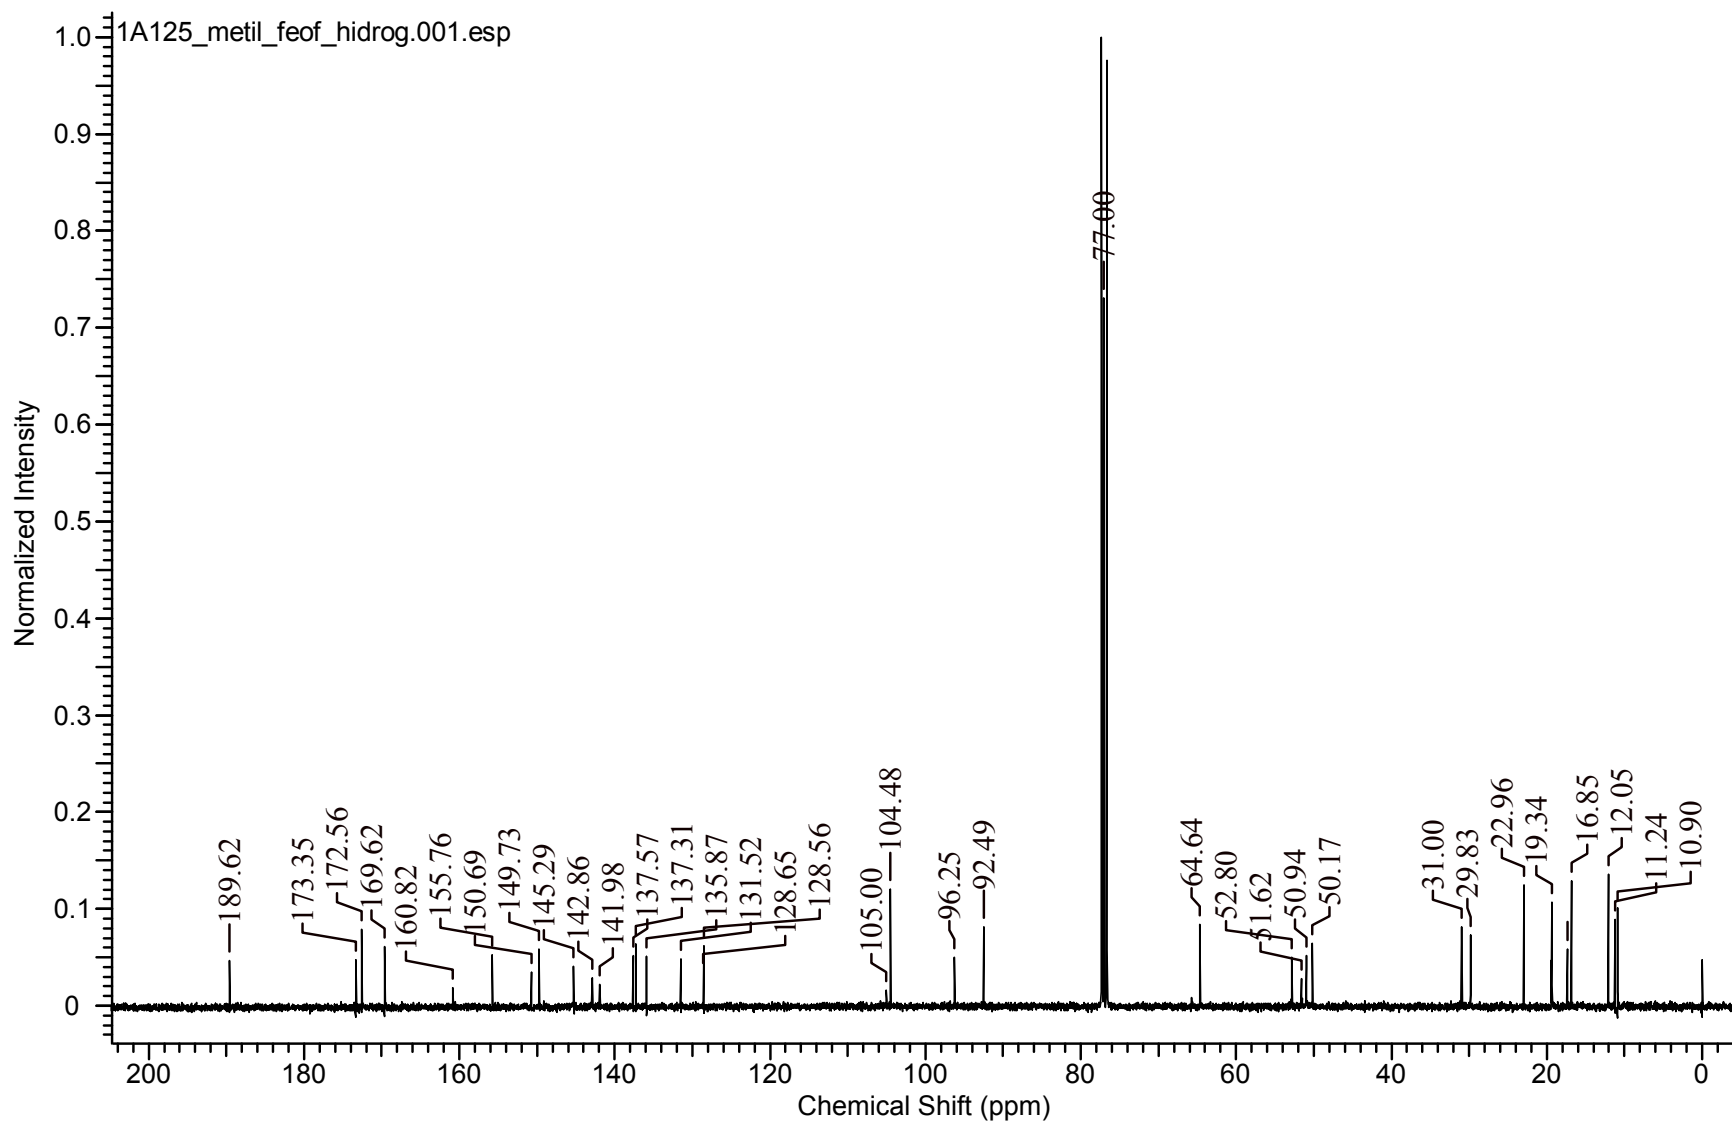

**Figure S4.**  $^{13}\text{C}$ -NMR (100 MHz) in  $\text{CDCl}_3$  of hydrogenated methyl pheophorbide-*a*.

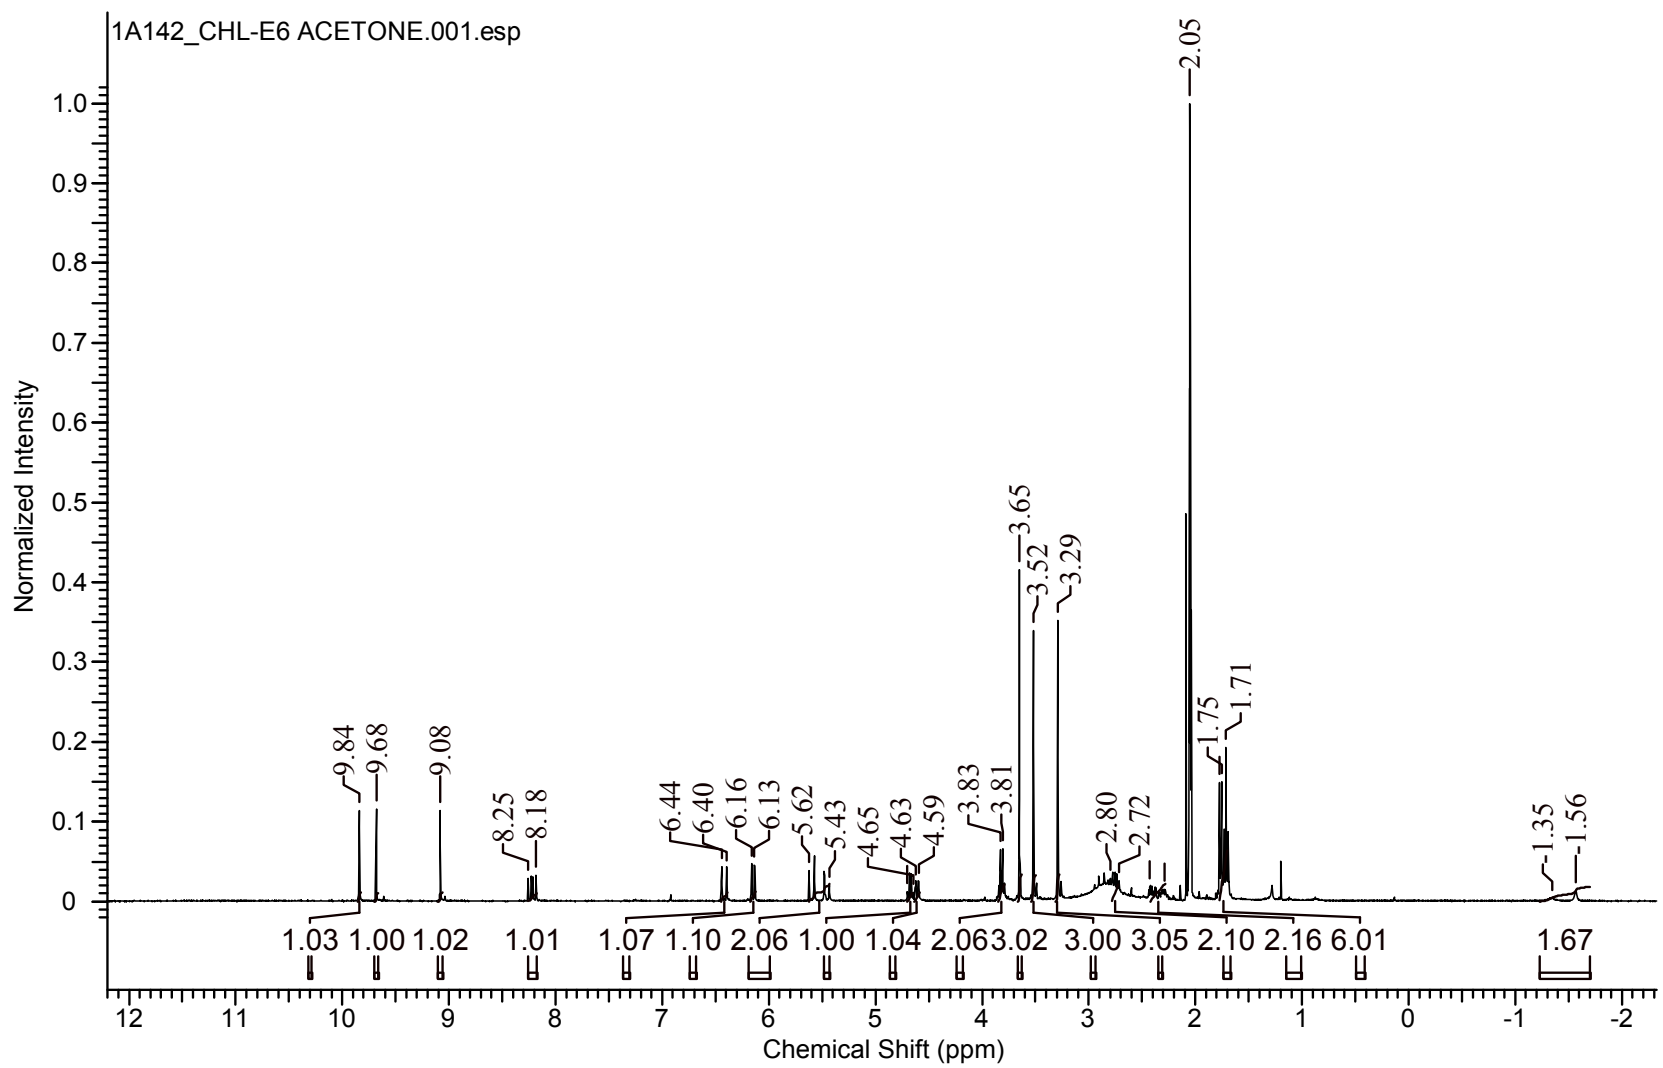

Figure S5.  $^1\text{H-NMR}$  (400 MHz) in  $(\text{CD}_3)_2\text{CO}$  of chl-e6.

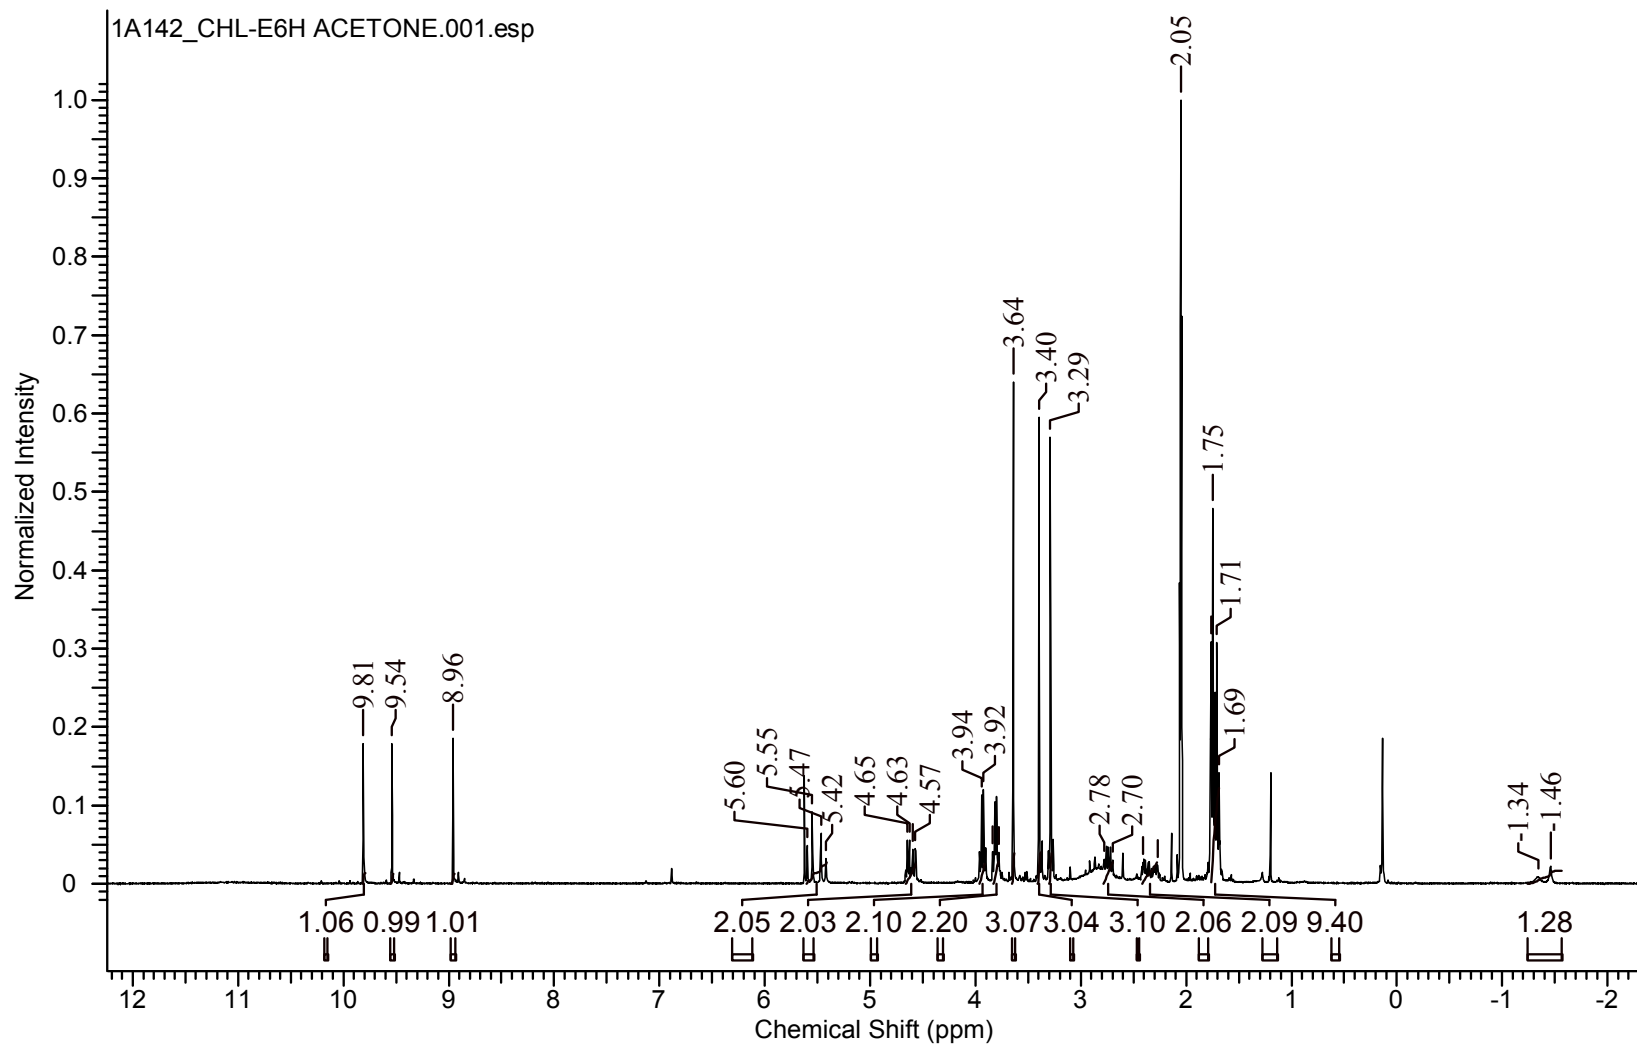

Figure S6.  $^1\text{H-NMR}$  (400 MHz) in  $(\text{CD}_3)_2\text{CO}$  of chl-e6H.

### Mass spectrum of chlorin-e6 (3)

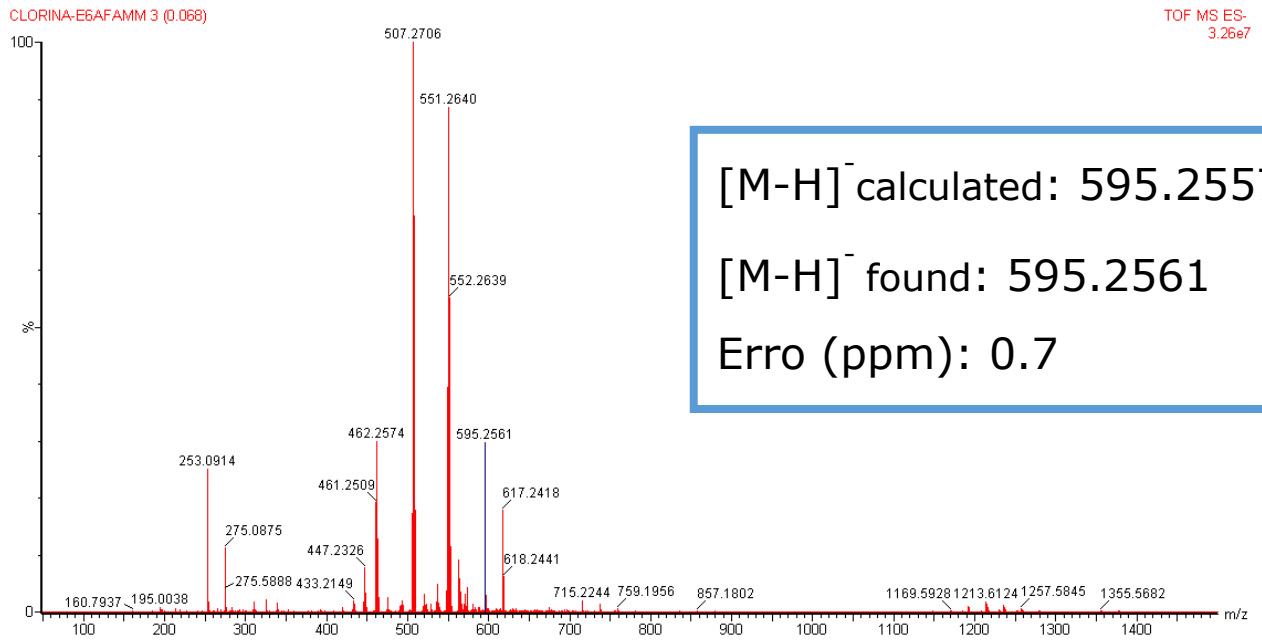

Figure S7: Mass spectrum of chlorin-e6 (3).

### Mass spectrum of chlorin-e6H (4)

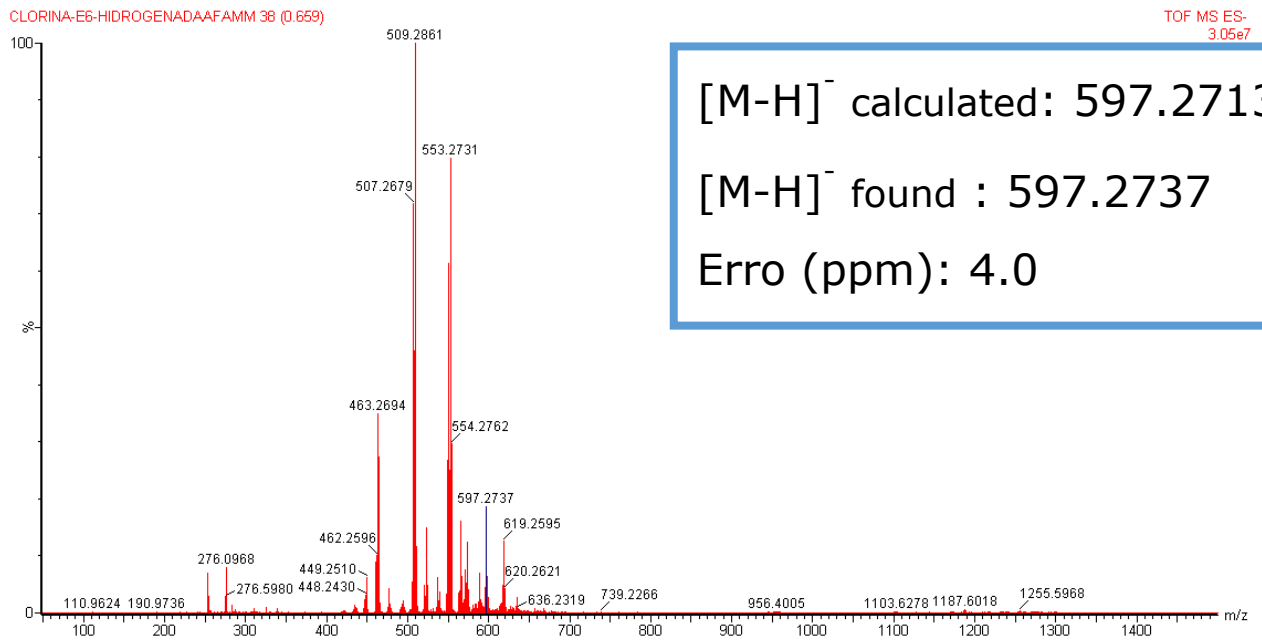

Figure S8: Mass spectrum of chl-e6H.



## UV-Vis spectrum of methyl pheophorbide-a (1)

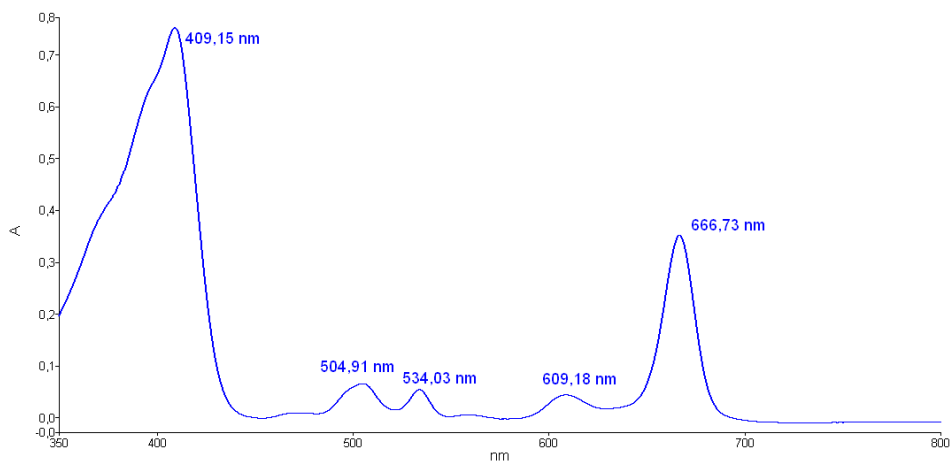

Figure S9: UV-Vis spectrum of methyl pheophorbide-*a* in ethyl acetate

## UV-Vis spectrum of hydrogenated methyl pheophorbide-a

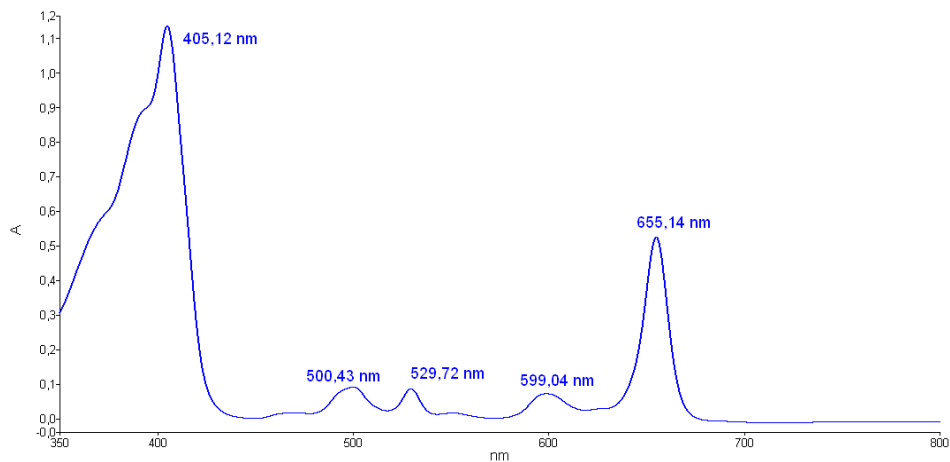

Figure S10: UV-Vis spectrum of hydrogenated methyl pheophorbide-*a* in ethyl acetate

### UV-Vis spectrum of chlorin-e6

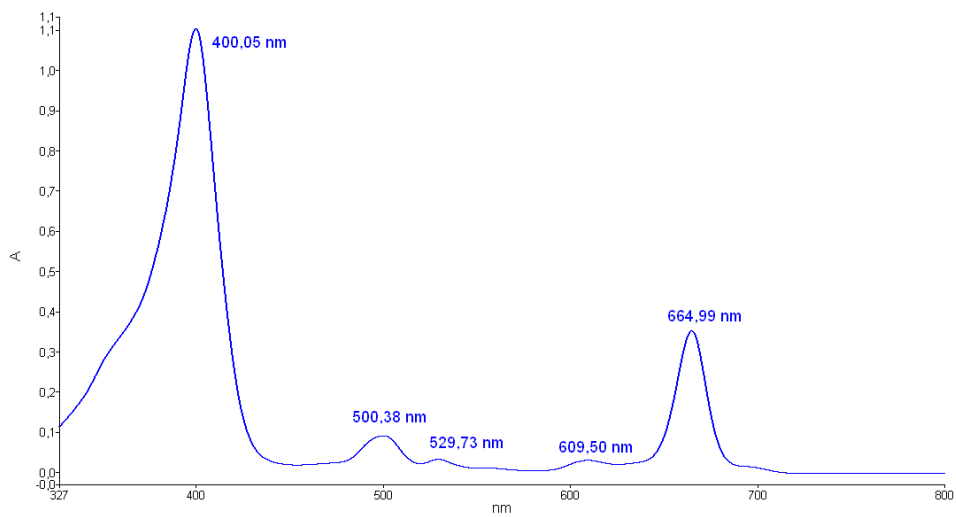

Figure S11: UV-Vis spectrum chl-e6 in ethyl acetate

### UV-Vis spectrum of chlorin-e6H

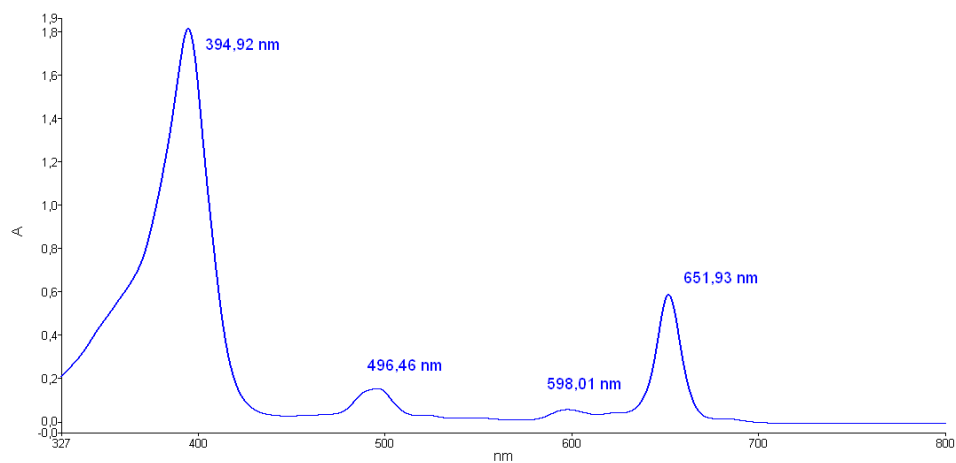

Figure S12: UV-Vis spectrum chl-e6H in ethyl acetate

### Singlet oxygen quantum yields

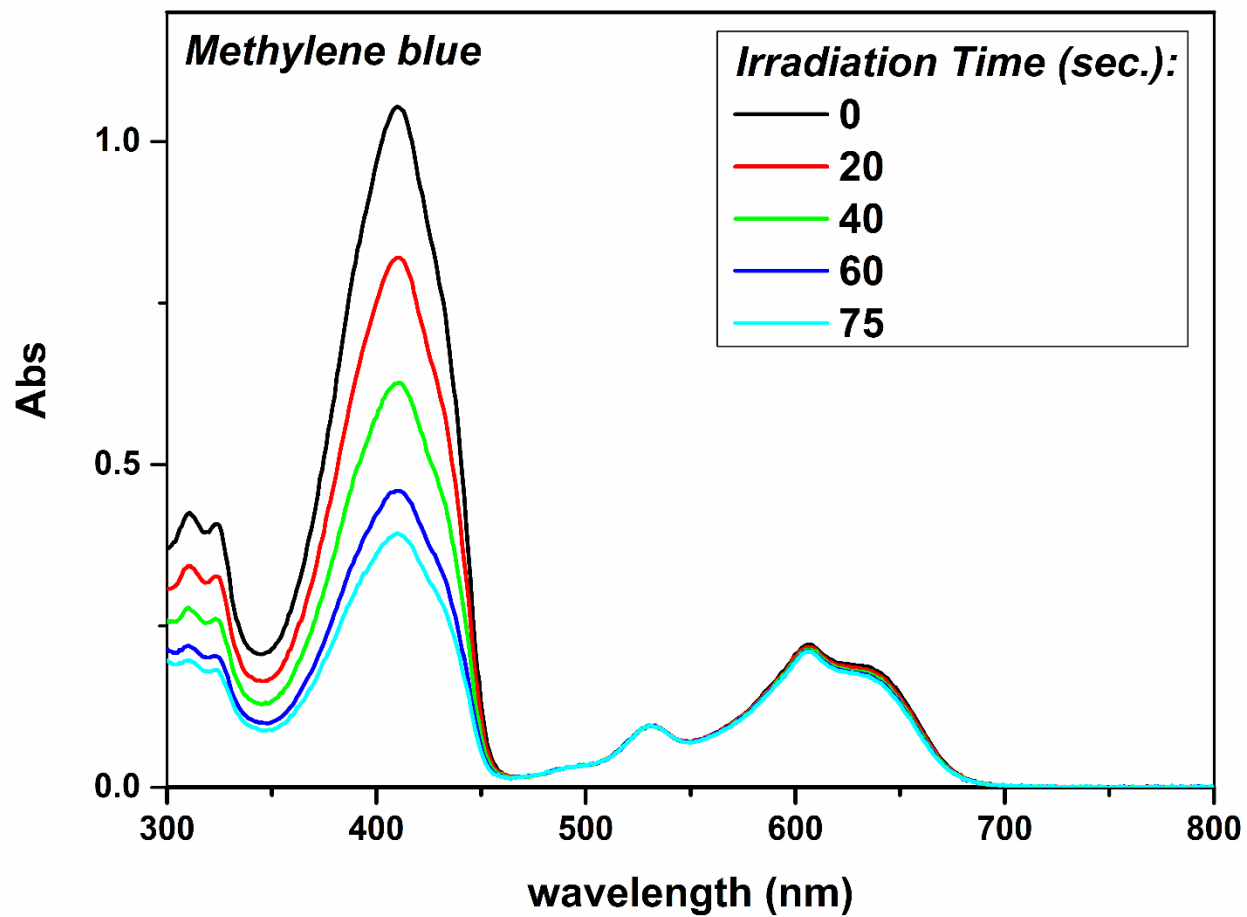

**Figure S13:** Absorption spectra of 50  $\mu\text{M}$  DPBF upon irradiation time in air saturated ethanol containing **MB** with irradiation at 660 nm.

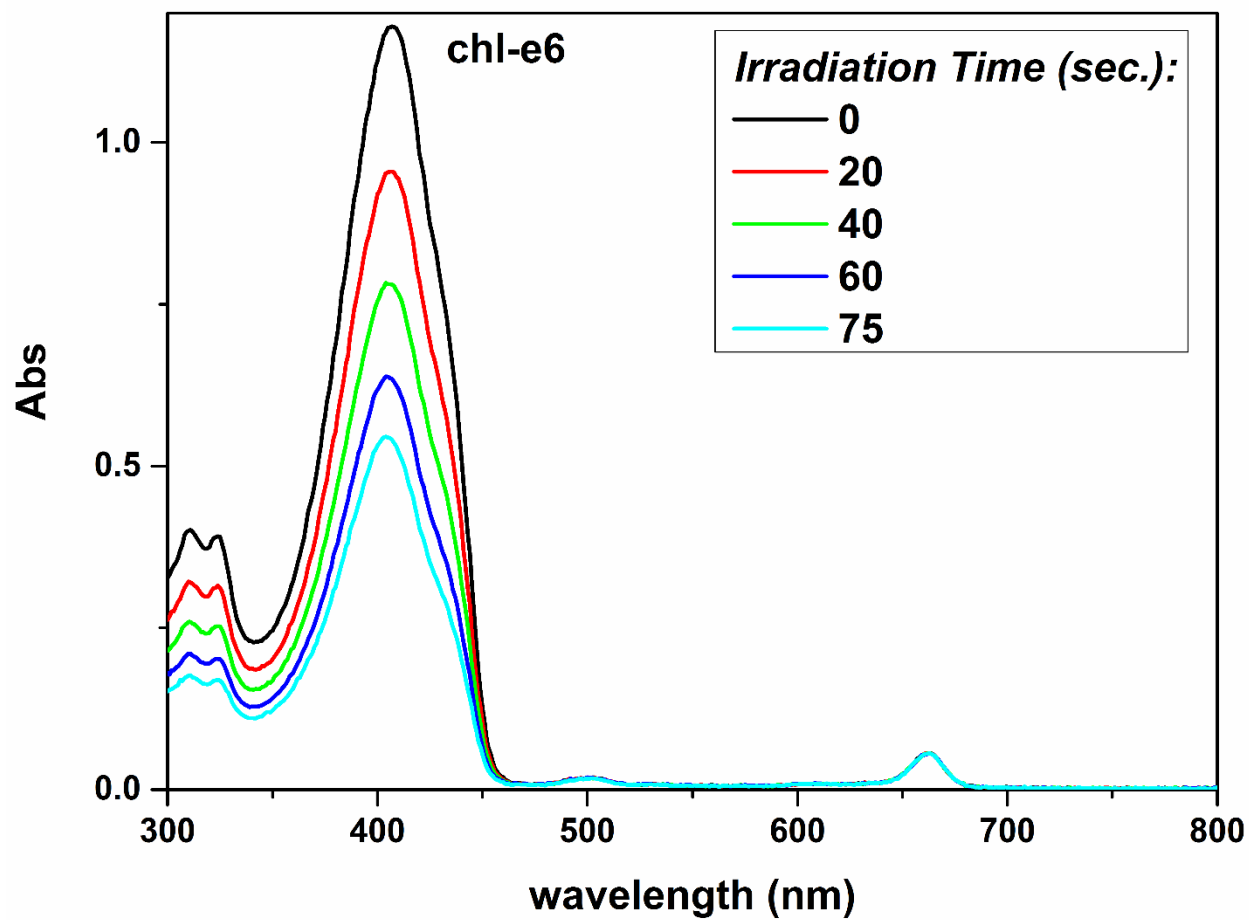

**Figure S14:** Absorption spectra of 50 μM DPBF upon irradiation time in air saturated ethanol containing **chl-e6** with irradiation at 660 nm.

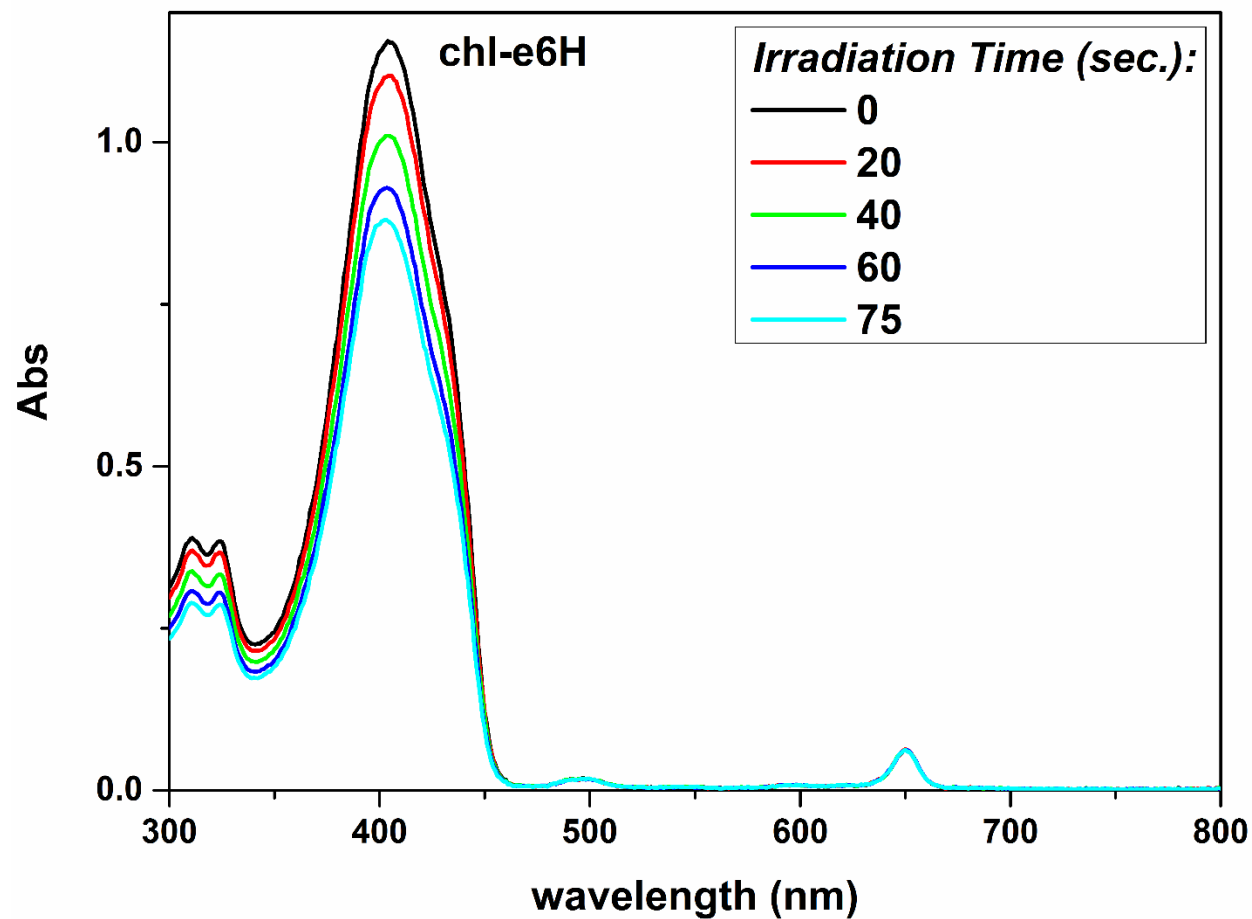

Figure S15: Absorption spectra of 50  $\mu\text{M}$  DPBF upon irradiation time in air saturated ethanol containing **chl-e6H** with irradiation at 660 nm.

## Photobleaching studies

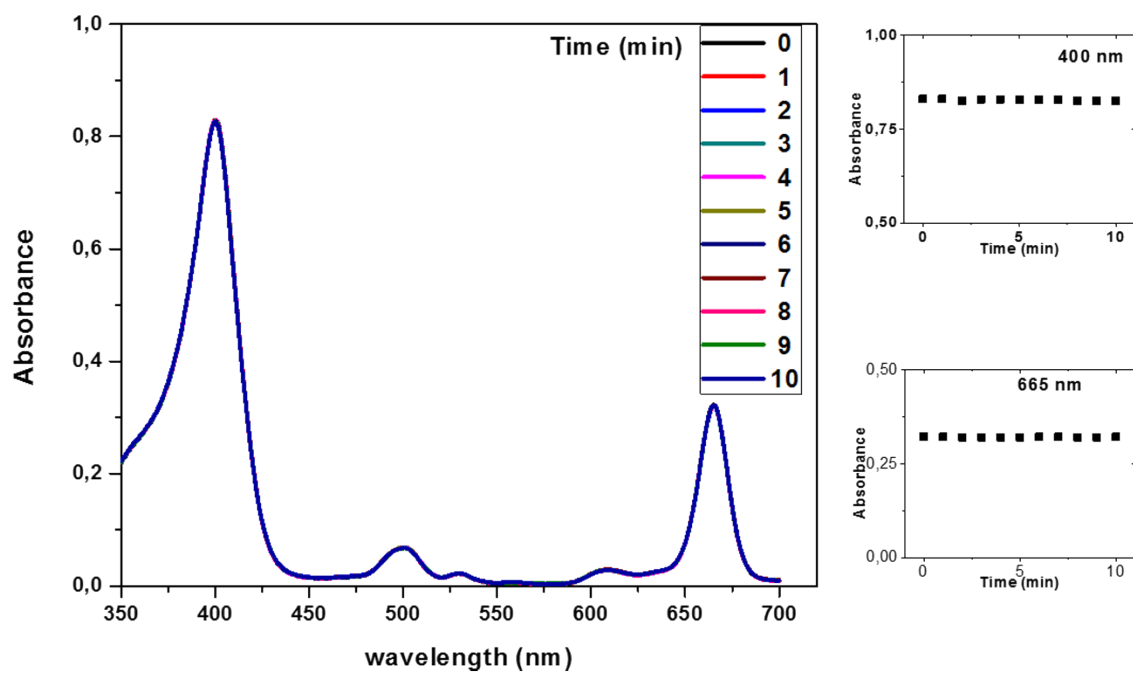

**Figure S16:** Photodegradation of **chl-c6** with irradiation periods of 1 min. *Insert:* Absorption at 400 nm and 665 nm in function of time

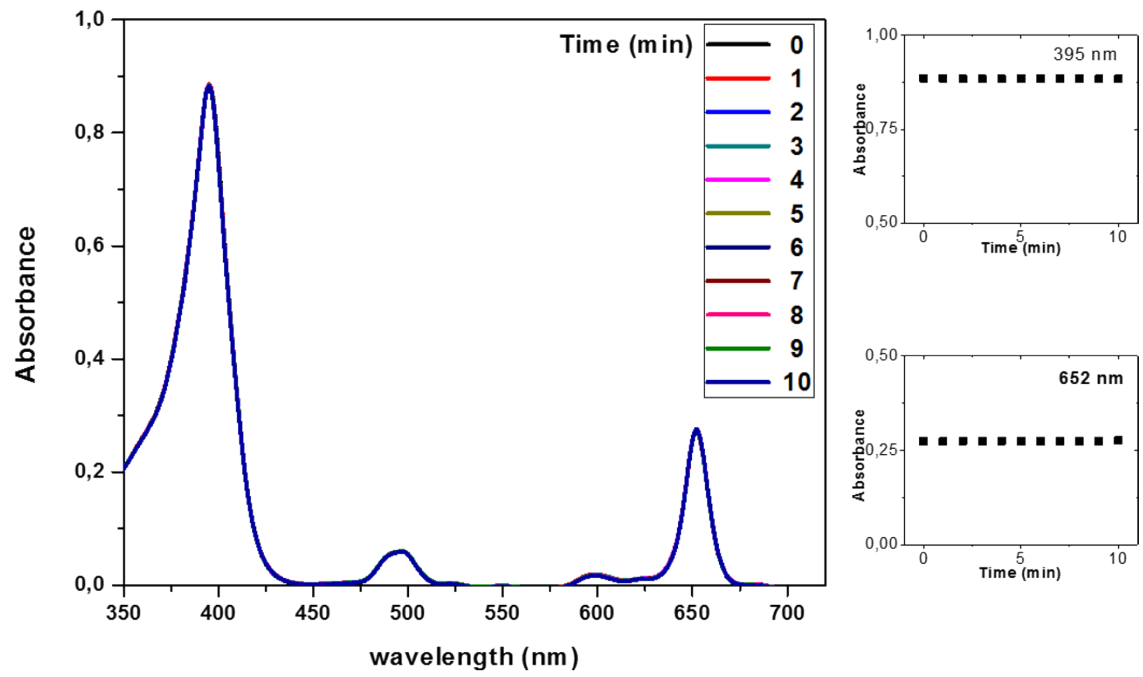

**Figure S17:** Photodegradation of **chl-e6H** with irradiation periods of 1 min. *Insert:* Absorption at 395 nm and 652 nm in function of time

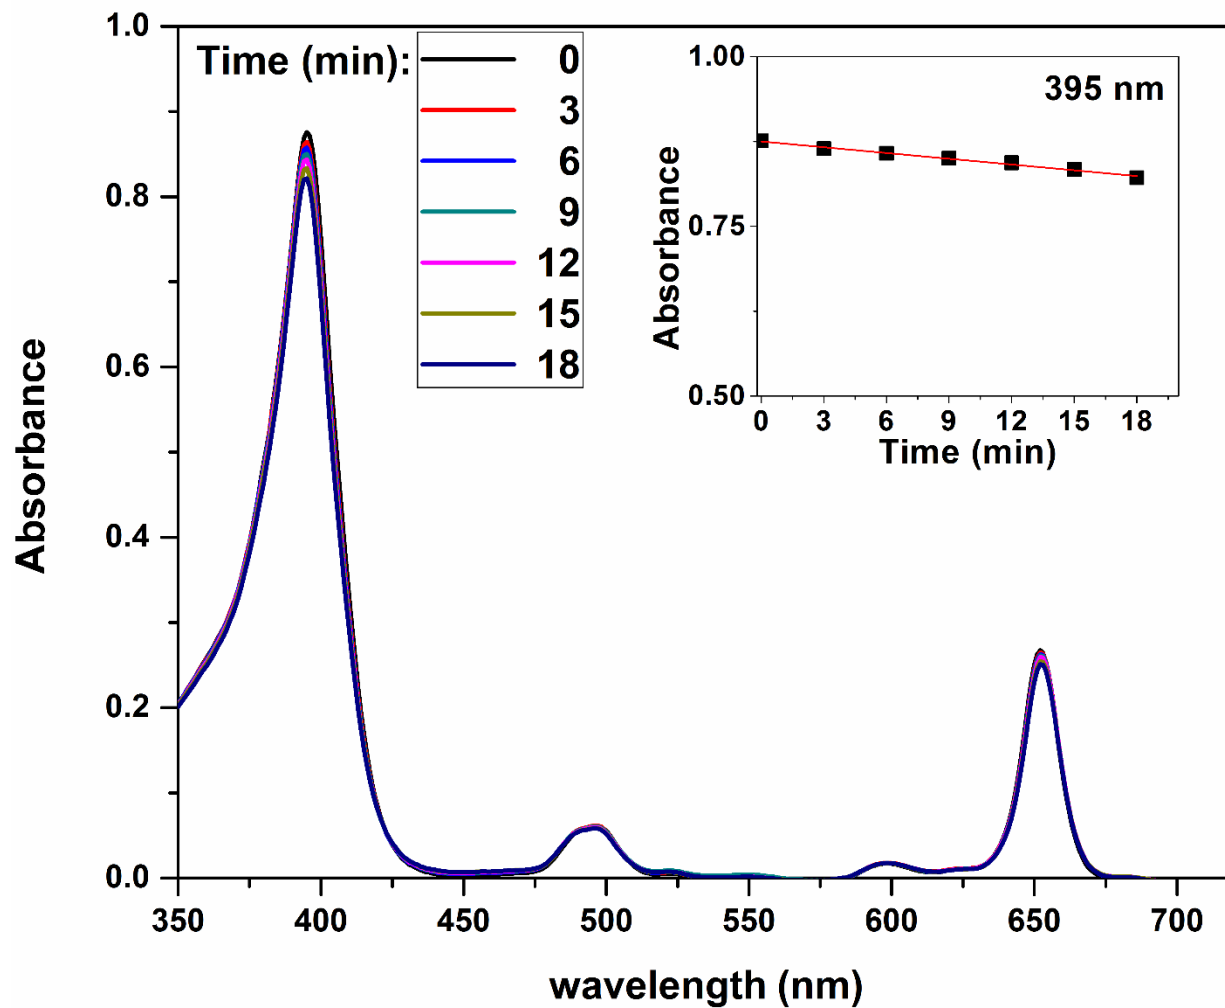

**Figure S18:** Photodegradation of chl-e6 with irradiation periods of 3 min. *Insert:* Absorption at 395 nm in function of time.



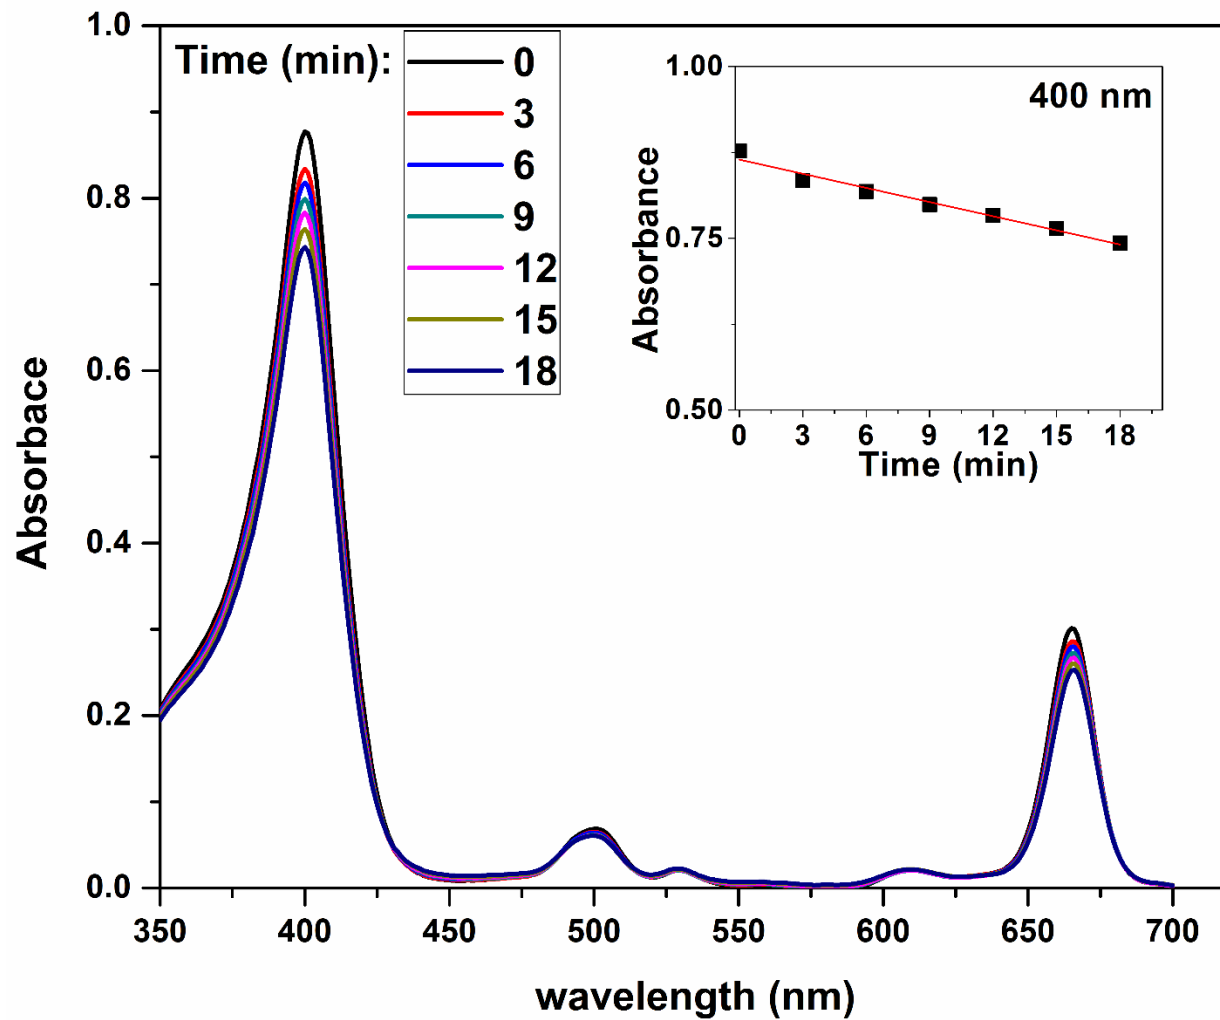

**Figure S19:** Photodegradation of chl-e6H with irradiation periods of 3 min. *Insert:* Absorption at 400 nm in function of time.
